# Supplementary material
Source: MDPI journal article supplement (https://www.mdpi.com/2073-4395/13/10/2611)
Supplement: s1 [file s1]

**Table S1.** qRT-PCR primers in this study.

| Gene ID       | Chromosome | Start position<br>(bp) | Stop position<br>(bp) | Forward primer sequence<br>(5'-3') | Reverse primer sequence<br>(5'-3') |
|---------------|------------|------------------------|-----------------------|------------------------------------|------------------------------------|
| BnaA08g00820D | chrA08     | 590429                 | 591075                | GATCATCGCCATCCTTCC                 | ACTGGCTCAGCGTCTTG                  |
| BnaA08g00890D | chrA08     | 627135                 | 629365                | AGGTTACACCGACCAATG                 | GAGCCAAACACCTAATGC                 |
| BnaA08g01000D | chrA08     | 724469                 | 729754                | CGTTCAATAATGGACCTG                 | GAAATGACTATCCCTGCT                 |
| BnaA08g01010D | chrA08     | 730140                 | 732728                | GAACCGATGCTTGCTTTA                 | CGTTATCACCTCCTACACC                |
| BnaA08g01020D | chrA08     | 732894                 | 736732                | CGTTCAATAATGGACCTG                 | GAAATGACTATCCCTGCT                 |
| BnaA08g01030D | chrA08     | 739465                 | 742831                | GGTGGTCCATTTCTCCCT                 | TCTACGGTTTCTGCTCCC                 |
| BnaA08g01070D | chrA08     | 806558                 | 808627                | TACATTGCCAAAGGACAC                 | AGGCAGGTCTTGTAATCC                 |
| BnaA08g01170D | chrA08     | 891150                 | 893938                | TCCGTTGCCCATCCTCAT                 | AGTGCTCGTGCCATCTCG                 |
| BnaA08g01250D | chrA08     | 937609                 | 940982                | GCTGGAAGGCTAATGTC                  | ATCTTGAGTACGCTTGGTG                |
| BnaA08g01260D | chrA08     | 949732                 | 951066                | TCTCGCTTCACTCCTTCC                 | TACAAACCCTCCTCCACC                 |
| BnaA08g01270D | chrA08     | 958579                 | 961647                | ACTCGTCTCCCTACATCC                 | AGAACACGTTCCTCAAGC                 |
| BnaA08g01330D | chrA08     | 1032671                | 1035656               | TTGCCCACAATGTCCCT                  | TTCGCTTCAGCCTCCAC                  |
| BnaA08g01350D | chrA08     | 1057419                | 1060065               | TTCAAAGCAGCACTCAA                  | AGACCGTCATGGTAAGG                  |
| BnaA08g02130D | chrA08     | 1625215                | 1628429               | GGAAGGCTGTGATGCTC                  | CACCACCCAGATGAACC                  |
| BnaA08g02150D | chrA08     | 1656411                | 1657211               | TGGCTATGTTCCAAGAAG                 | GTGAAACGGTGATGAGG                  |
| BnaA08g02160D | chrA08     | 1657275                | 1658470               | GAGGCTATGGAAGGTGA                  | AGTCTGTGAGCCATTGA                  |
